# Supplementary figures and images for: First thrust measurements in ionic multi-propeller rotational engines
Source: Research Square preprint supplement (doi:10.21203/rs.3.rs-2241697/v1), 2022-11-07

# ROTARY IONIC MULTI-PROPELLER ENGINES

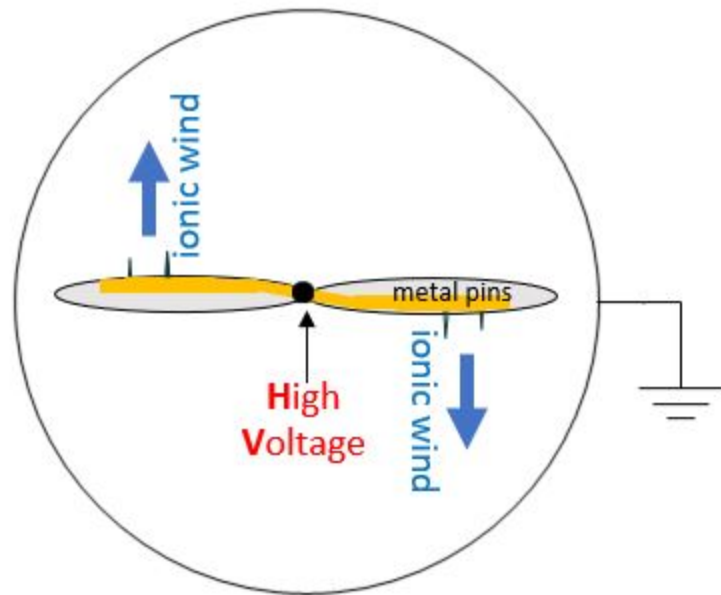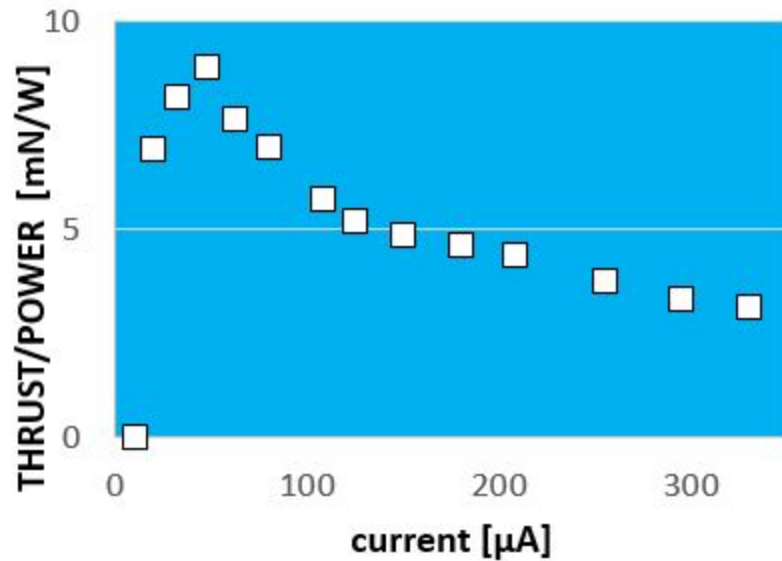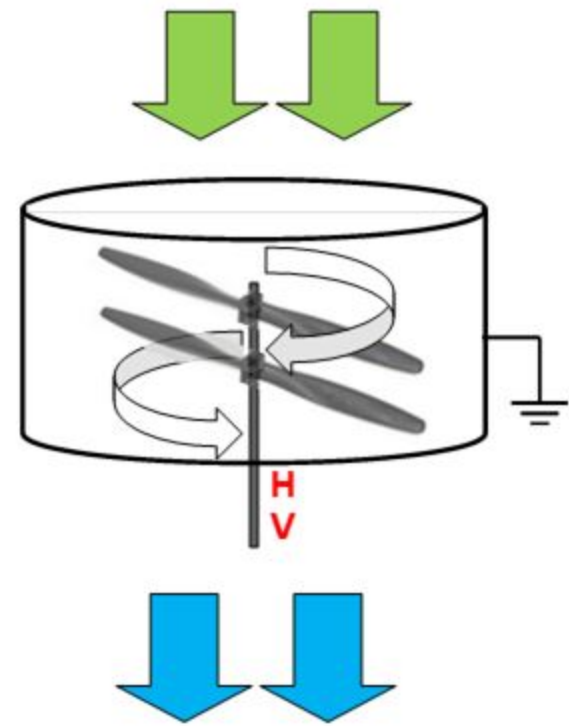

THRUST → TORQUE → ROTATION → AXIAL THRUST

Supplement: Supplementary file 1 [file 2297b4db2d83fcfae9dc346e.pdf]
